# Supplementary material for: Antibiotic Resistome Biomarkers associated to the Pelagic Sediments of the Gulfs of Kathiawar Peninsula and Arabian Sea
Source: PubMed Central journal article supplement (PMC6872816; doi:10.1038/s41598-019-53832-9), 2019-11-21
Supplement: 41598_2019_53832_MOESM1_ESM.pdf [file 41598_2019_53832_MOESM1_ESM.pdf]

## **Antibiotic Resistome Biomarkers associated to the Pelagic Sediments of the Gulfs of Kathiawar Peninsula and Arabian Sea**

Chandrashekar Mootapally<sup>1,5#\*</sup>, Neelam M. Nathani<sup>2,5#</sup>, Paresh Poriya<sup>3</sup>, Imtiyaz Beleem<sup>2</sup>, Jignesh C. Dabhi<sup>1</sup>, Indra R. Gadhvi<sup>1</sup>, Chaitanya G. Joshi<sup>4,5</sup>

<sup>1</sup> Department of Marine Science, Maharaja Krishnakumarsinhji Bhavnagar, University, Bhavnagar - 364-001, Gujarat, India

<sup>2</sup> Department of Life Sciences, Maharaja Krishnakumarsinhji Bhavnagar University, Bhavnagar - 364-001, Gujarat, India

<sup>3</sup> Government Science College, Bhakta Kavi Narsinh Mehta University, Veraval- 362-265, Gujarat, India

<sup>4</sup> Department of Animal Biotechnology, College of Veterinary & Animal Husbandry, Anand Agricultural University, Anand - 388-001, Gujarat, India

<sup>5</sup> Gujarat Biotechnology Research Centre (GBRC), Department of Science & Technology Government of Gujarat, Gandhinagar - 382-011, Gujarat, India

# Authors have contributed equally.

\*Corresponding Authors:

Dr. Chandrashekar Mootapally,  
Department of Marine Science,  
Maharaja Krishnakumarsinhji Bhavnagar,  
University, Bhavnagar - 364-001, Gujarat, India  
E-mail: chandu.avi@gmail.com

**Supplementary Information 1:** (a) Sampling regions of study with the 4 Gulf of Kutch sites indicated (Mapdata: Google, Imagery; Attribution: Map data©2017 Google Imagery ©2017 TerraMetrics). (b) Sampling site details (Wherein GOKS1-4 stands for Gulf of Kutch Sample 1 to Sample 4) (c) Sampling methodology

(a)

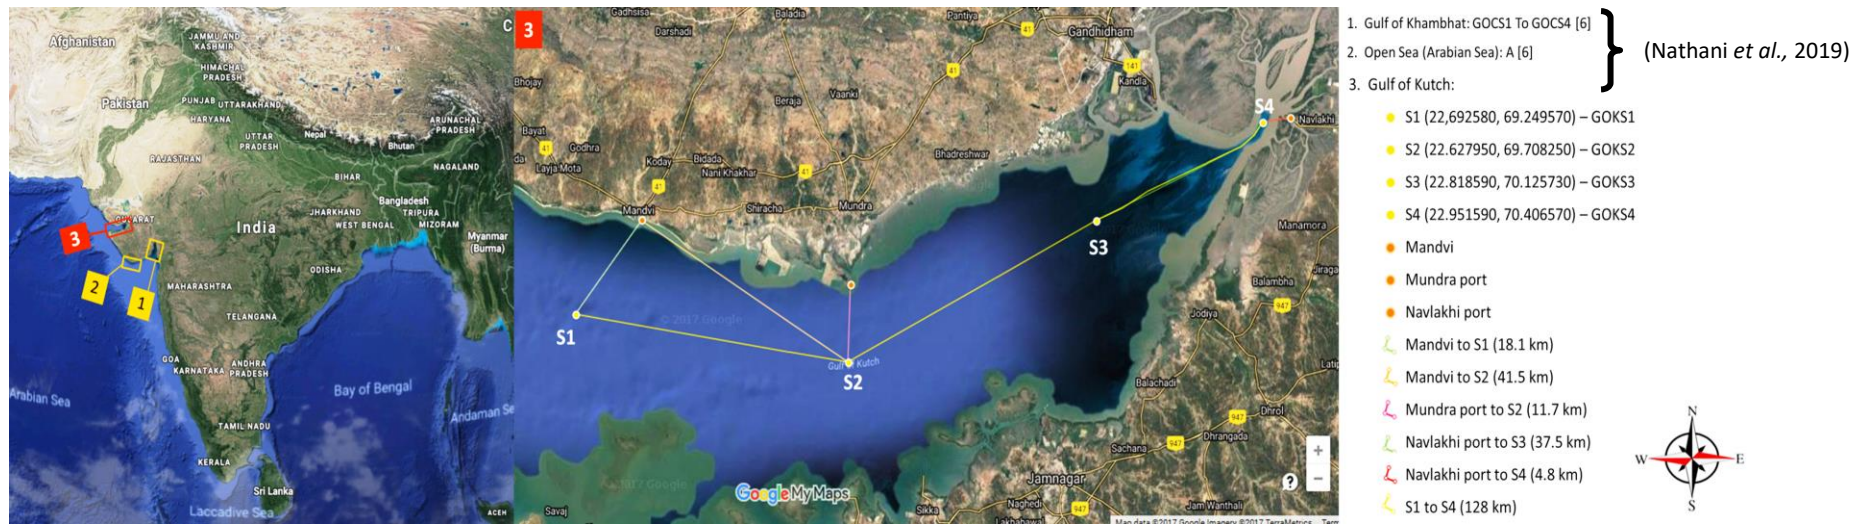

(b)

| <b>Sample</b> | <b>Collection Date</b> | <b>Time</b> | <b>Latitude</b> | <b>Longitude</b> | <b>Depth</b> | <b>Elevation</b> |
|---------------|------------------------|-------------|-----------------|------------------|--------------|------------------|
| GOKS1         | 03.05.2017             | 11:15 am    | 22°41'33.3"N    | 69°14'58.5"E     | 32m          | -48m             |
| GOKS2         | 04.05.2017             | 12:06 am    | 22°37'40.6"N    | 69°42'29.7"E     | 28m          | -40m             |
| GOKS3         | 08.05.2017             | 04:10 pm    | 22°49'06.9"N    | 70°07'32.6"E     | 15m          | -10m             |
| GOKS4         | 09.05.2017             | 05:05 pm    | 22°57'05.7"N    | 70°24'23.6"E     | 5m           | -5m              |

(c)

After the 100 cm corer sediments were collected, the internal pp liner was dismantled from the corer sampler and the pp liner edges were sealed. These were further stored in customized (>1m in length) insulated ice cabinet to maintain the sediment samples under low temperature during the sail and immediately transferred to deep freezer upon reaching the laboratory until further processing. The internal pp liners of each sediment samples were cut down vertically into two equal sections with utmost care taken to not disturb the sediments and then the sediment was separated into two halves vertically using thin metal wire by slipping right down through the vertical core length with the purpose to get a clear view of sediment texture and color for proper documentation. The sediment were further transferred into sterile containers by collecting 10 cm portions each from Top (T), Middle (M) and Bottom (B) sediments in the vertical core halves as shown below with care taken that sediment from different lengths do not mix.

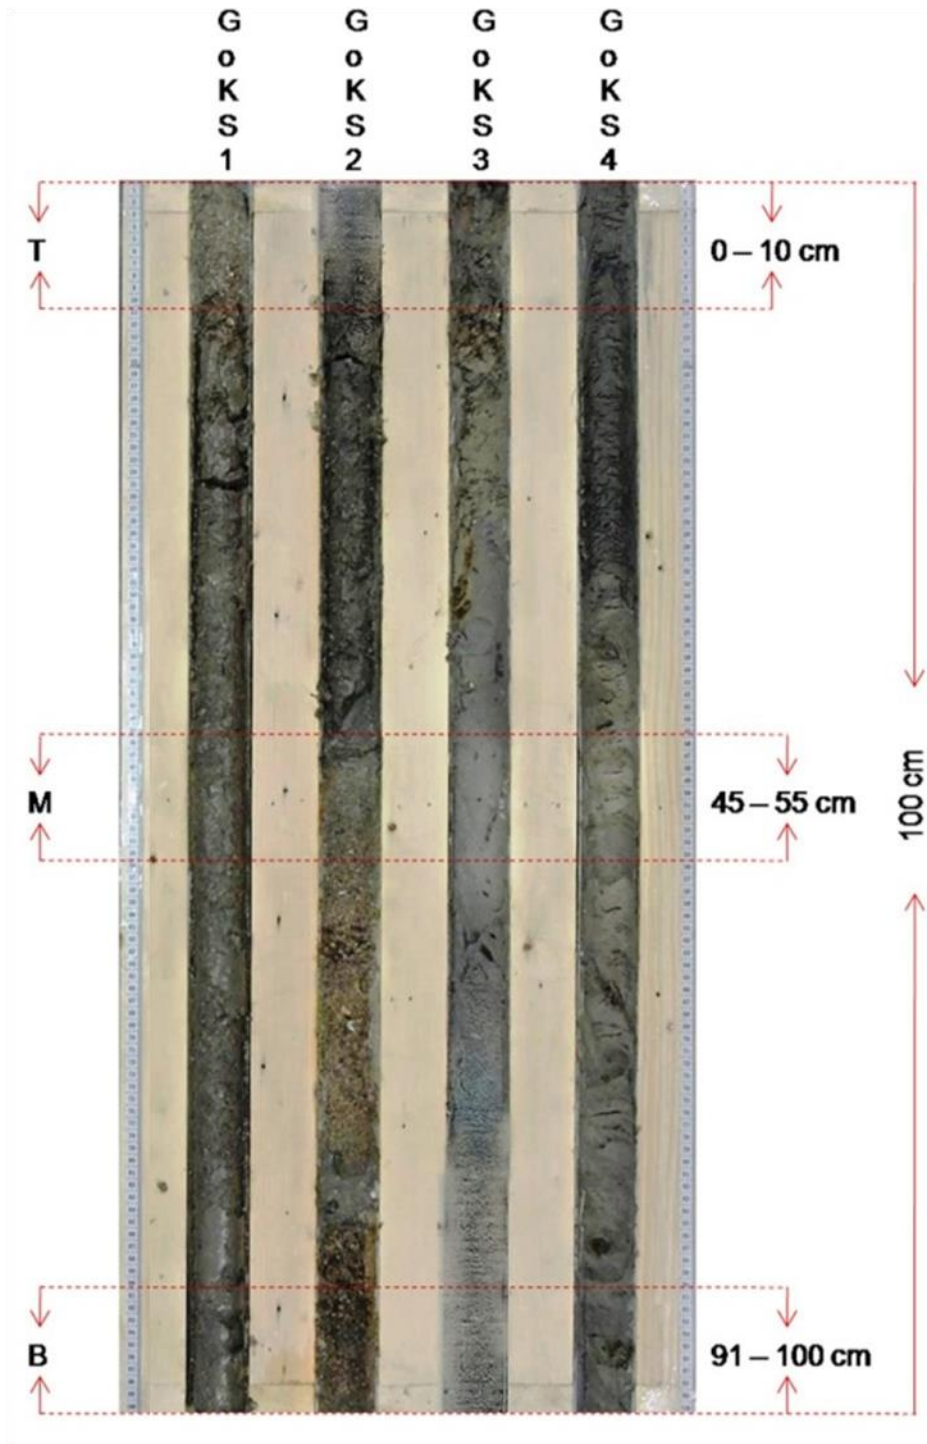

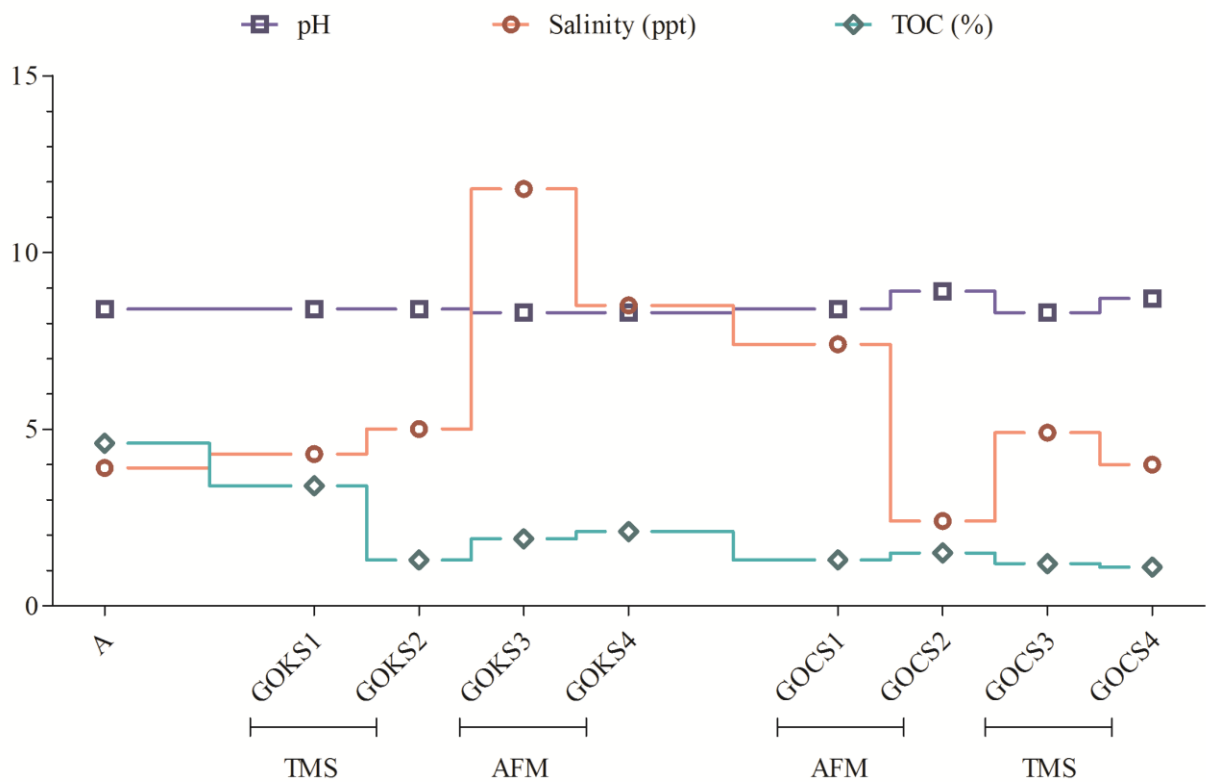

**Supplementary Figure 1:** Trend of the major physico-chemical parameters in the studied samples (values are mean of top, middle and bottom of respective samples)

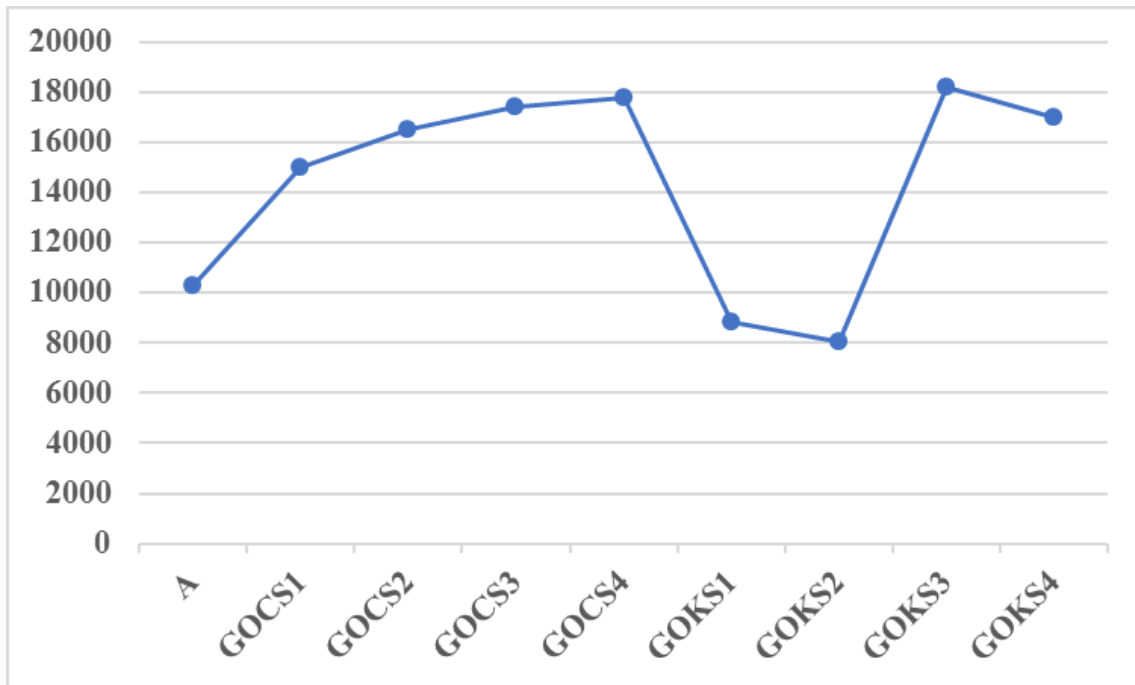

**Supplementary Figure 2:** Hits to bacmet genes across the studied samples

**Supplementary Figure 3.** Significantly varying metal resistant genes between (a) Cluster 1 and other samples (b) Cluster 2 and other samples (c) Cluster 3 and other samples

(a)

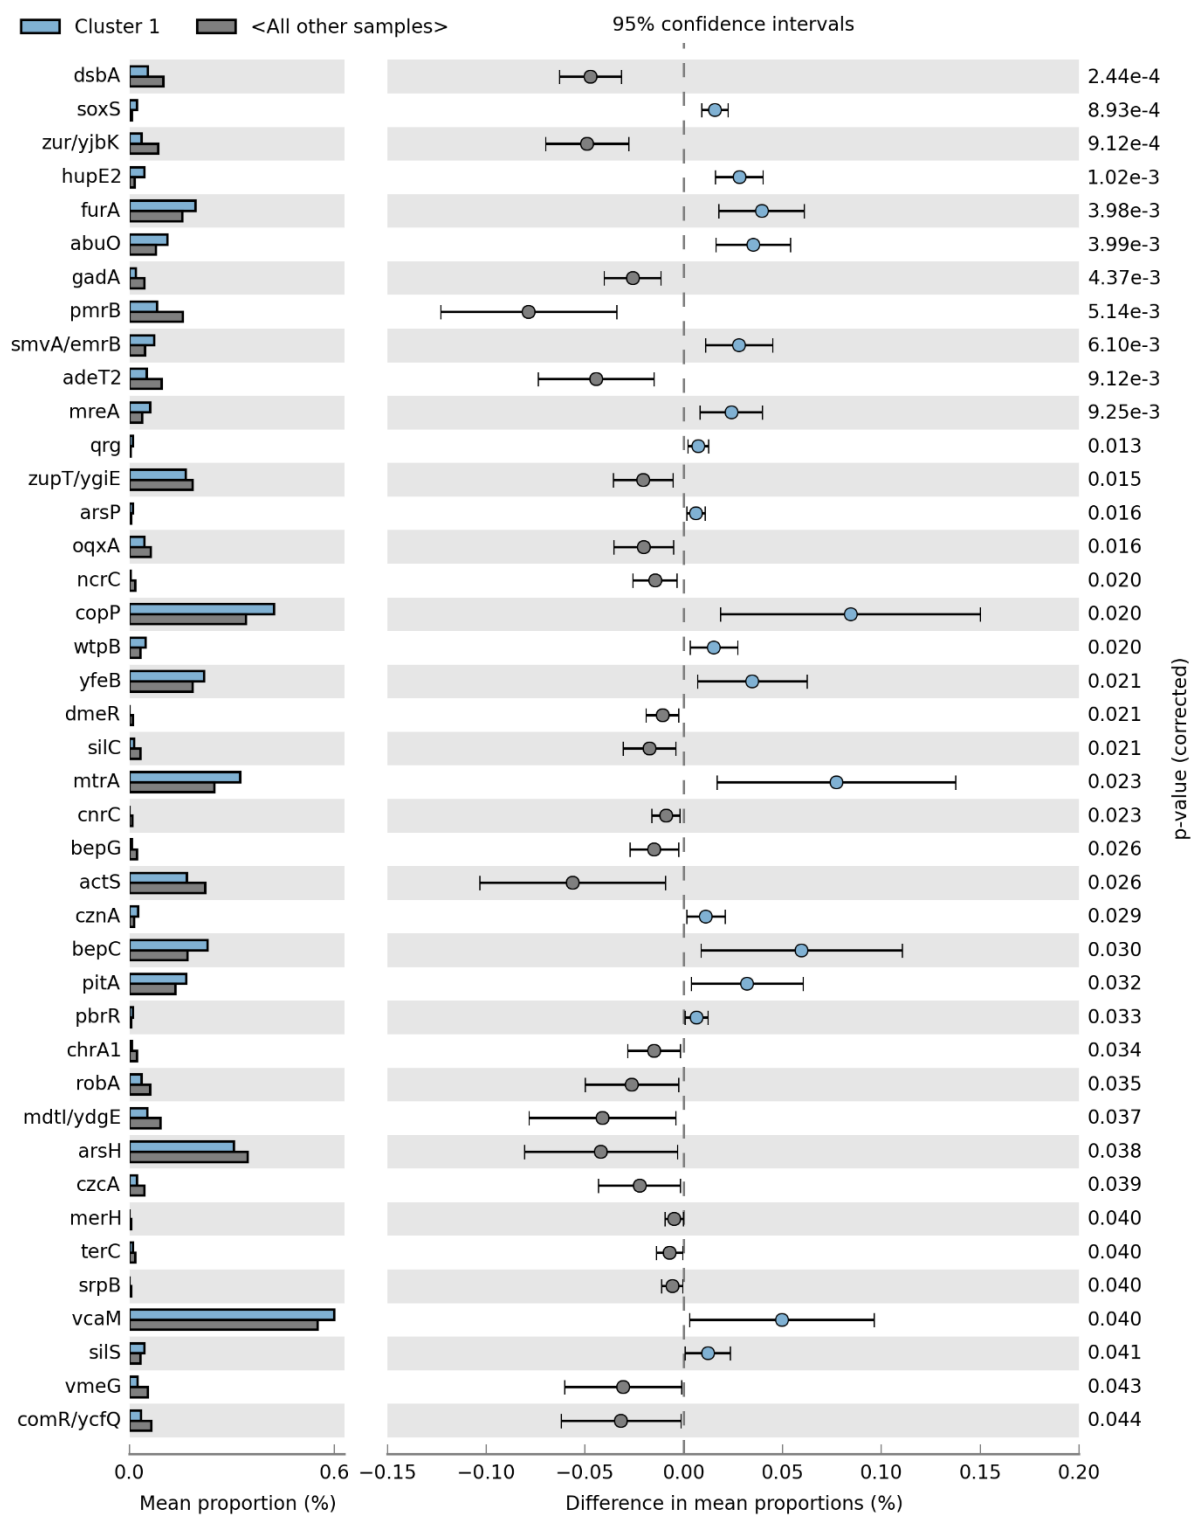

(b)

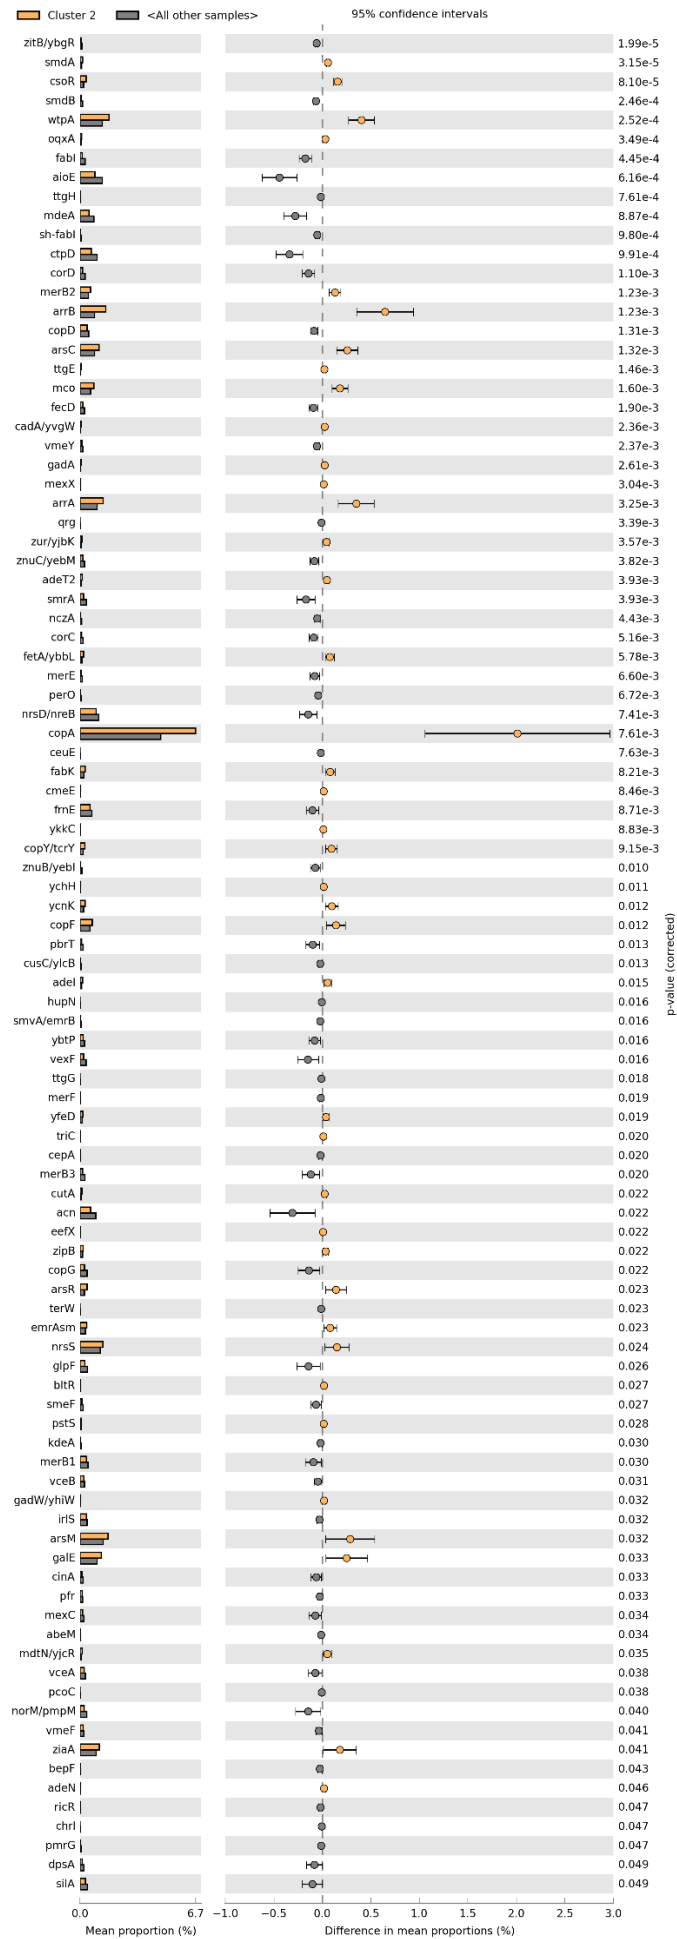



(C)

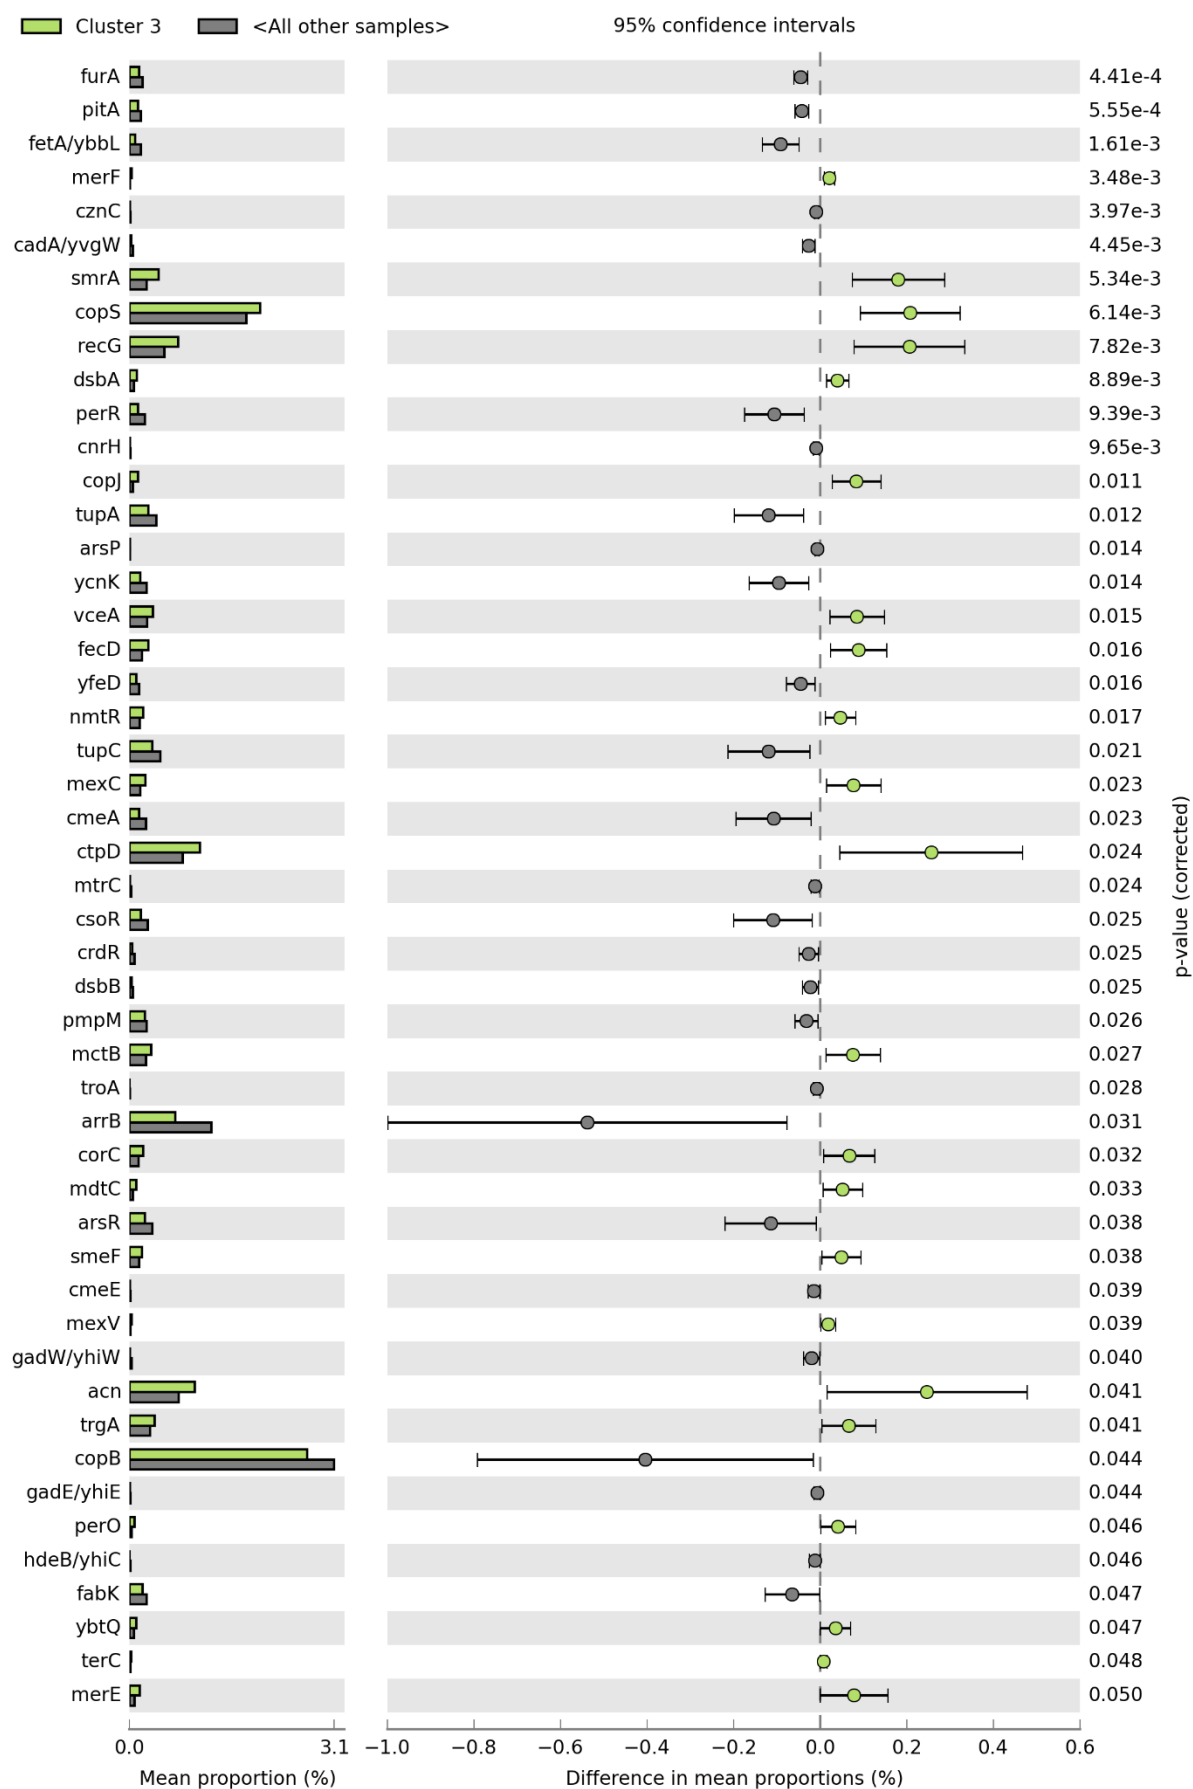

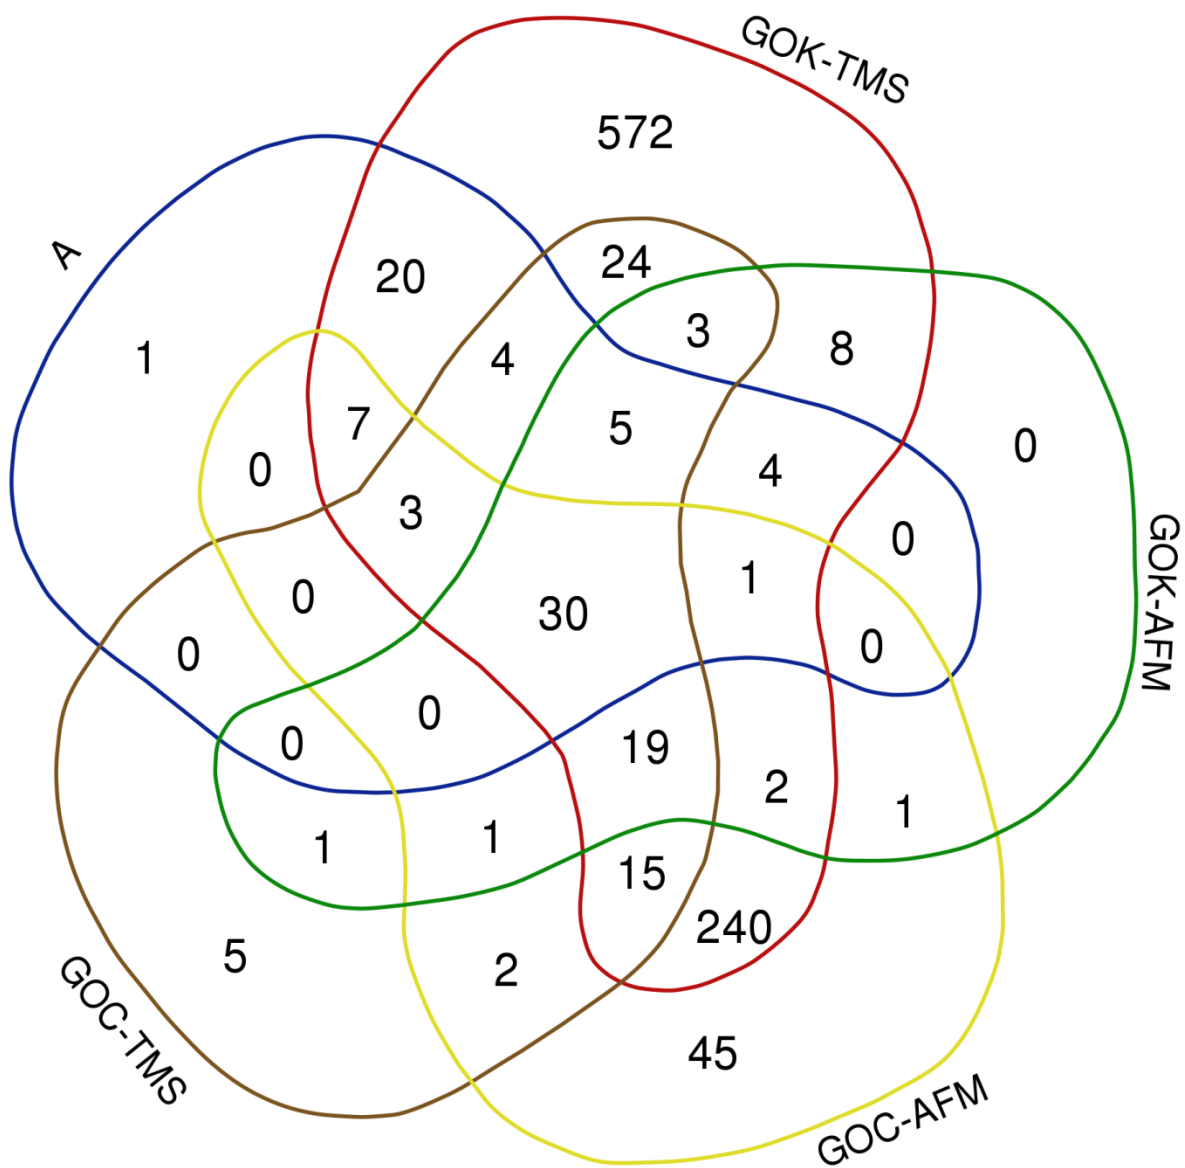

**Supplementary Figure 4:** Venn diagram showing the unique and shared ARGs absent among studied samples (the comparison was considered between **A** and following groups **GOK-TMS**: GOKS1 and S2; **GOK-AFM**: GOKS3 and S4; **GOC-AFM**: GOCS1 and S2; **GOC-TMS**: GOCS3 and S4)

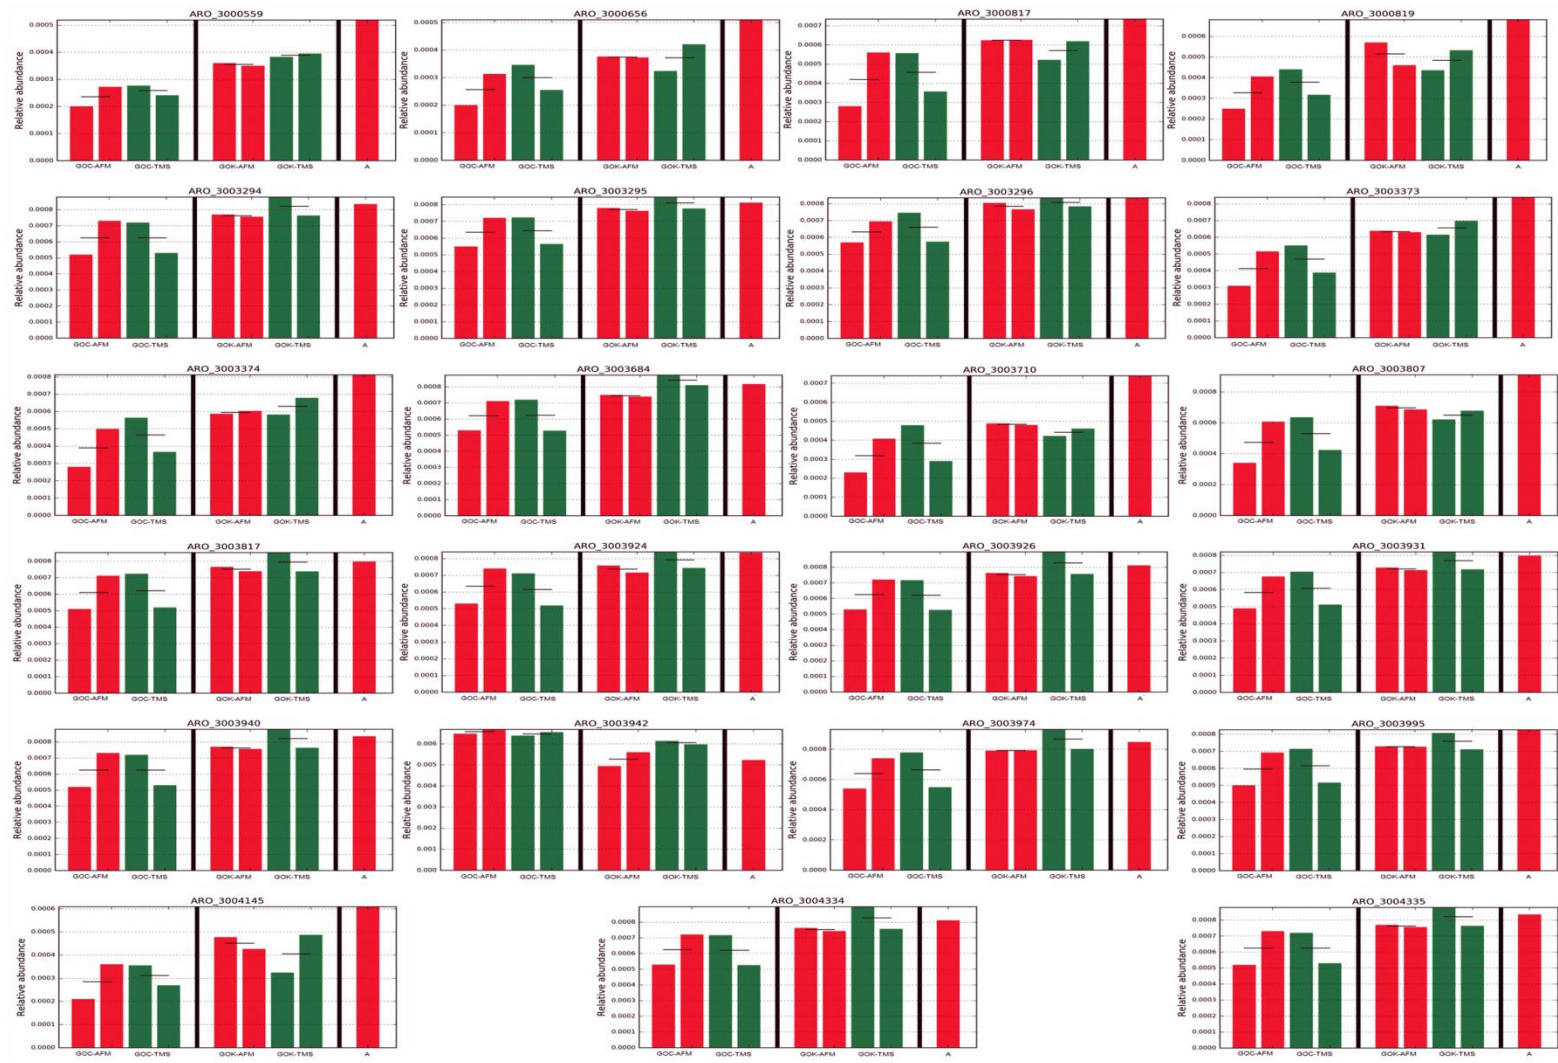

**Supplementary Figure 5:** Proportion of individual differentially expressed biomarker ARGs in subclasses (GOK-TMS, GOK-AFM, GOC-TMS and GOC-AFM)

**Supplementary Table 1:** Physicochemical properties of the studied sediment samples (mean±SD)

| Sample ID | pH        | EC (mS)    | TDS (ppt)  | Salinity (ppt) | Res (Ohm) | %TOC      |
|-----------|-----------|------------|------------|----------------|-----------|-----------|
| AT        | 8.47±0.02 | 7.45±0.05  | 3.73±0.1   | 4.10±0.05      | 133±3     | 4.74±0.02 |
| AM        | 8.53±0.01 | 5.04±0.07  | 2.52±0.00  | 2.70±0.02      | 197±1     | 3.27±0.02 |
| AB        | 8.05±0.01 | 8.58±0.10  | 4.28±0.00  | 4.77±0.03      | 116±10    | 5.65±0.03 |
| GOKS1T    | 8.48±0.01 | 7.26±0.02  | 3.63±0.00  | 4.01±0.01      | 137±4     | 6.49±0.03 |
| GOKS1M    | 8.47±0.02 | 7.27±0.01  | 3.64±0.00  | 4.00±0.03      | 136±3     | 1.80±0.00 |
| GOKS1B    | 8.35±0.01 | 8.53±0.03  | 4.28±0.01  | 4.76±0.03      | 116±2     | 1.86±0.01 |
| GOKS2T    | 8.41±0.02 | 12.30±0.05 | 6.15±0.01  | 7.03±0.04      | 81±1      | 1.45±0.00 |
| GOKS2M    | 8.12±0.01 | 10.05±0.03 | 5.02±0.01  | 5.69±0.01      | 98±1      | 1.84±0.01 |
| GOKS2B    | 8.57±0.01 | 4.39±0.00  | 2.22±0.00  | 2.38±0.00      | 222±3     | 0.55±0.00 |
| GOKS3T    | 8.09±0.01 | 20.80±0.04 | 10.43±0.03 | 12.51±0.02     | 47.8±1    | 1.87±0.01 |
| GOKS3M    | 8.51±0.02 | 20.00±0.03 | 9.99±0.02  | 11.93±0.02     | 49.9±2    | 1.63±0.01 |
| GOKS3B    | 8.33±0.01 | 18.65±0.03 | 9.31±0.02  | 11.01±0.01     | 53±8      | 2.21±0.02 |
| GOKS4T    | 8.09±0.00 | 11.65±0.01 | 5.82±0.00  | 6.63±0.01      | 85±2      | 2.14±0.03 |
| GOKS4M    | 8.35±0.01 | 12.60±0.01 | 6.30±0.01  | 7.21±0.02      | 79±1      | 2.27±0.02 |
| GOKS4B    | 8.49±0.01 | 19.58±0.03 | 9.80±0.02  | 11.65±0.02     | 51±1      | 1.90±0.01 |
| GOCS1T    | 8.32±0.00 | 13.40±0.02 | 6.71±0.03  | 7.73±0.05      | 74±5      | 1.30±0.00 |
| GOCS1M    | 8.30±0.01 | 13.59±0.05 | 6.79±0.01  | 7.86±0.04      | 73±9      | 1.37±0.00 |
| GOCS1B    | 8.44±0.03 | 11.49±0.05 | 5.75±0.02  | 6.54±0.05      | 87±3      | 1.29±0.00 |
| GOCS2T    | 8.99±0.01 | 3.69±0.06  | 1.86±0.00  | 1.95±0.03      | 270±2     | 1.64±0.00 |
| GOCS2M    | 8.88±0.00 | 4.37±0.03  | 2.19±0.01  | 2.33±0.01      | 227±3     | 1.28±0.00 |
| GOCS2B    | 8.73±0.01 | 5.34±0.02  | 2.68±0.04  | 2.90±0.01      | 185±3     | 1.70±0.02 |
| GOCS3T    | 8.10±0.02 | 11.02±0.03 | 5.52±0.01  | 6.26±0.03      | 90±3      | 1.14±0.01 |
| GOCS3M    | 8.48±0.01 | 6.82±0.08  | 3.41±0.00  | 3.73±0.02      | 146±7     | 1.24±0.01 |
| GOCS3B    | 8.34±0.02 | 8.48±0.05  | 4.24±0.02  | 4.67±0.02      | 118±8     | 1.24±0.01 |
| GOCS4T    | 8.85±0.01 | 5.46±0.03  | 2.73±0.01  | 2.94±0.01      | 182±6     | 1.07±0.01 |
| GOCS4M    | 8.45±0.01 | 9.26±0.01  | 4.65±0.00  | 5.21±0.03      | 107±5     | 0.96±0.00 |
| GOCS4B    | 8.68±0.02 | 6.77±0.06  | 3.40±0.02  | 3.73±0.01      | 146±4     | 1.21±0.01 |

EC: Electrical Conductivity; TDS: Total Dissolved Salts; Res: Resistance; TOC: Total Organic Carbon; mS: Milli Simon; ppt: parts per trillion.

**Supplementary Table 2:** Abundance (%) of observed phyla in the samples

| <b>Phylum</b>                | <b>A</b> | <b>GOKS1</b> | <b>GOKS2</b> | <b>GOKS3</b> | <b>GOKS4</b> | <b>GOCS1</b> | <b>GOCS2</b> | <b>GOCS3</b> | <b>GOCS4</b> |
|------------------------------|----------|--------------|--------------|--------------|--------------|--------------|--------------|--------------|--------------|
| <i>Acidobacteria</i>         | 0.777654 | 0.817228     | 0.928162     | 0.761682     | 1.115457     | 1.282692     | 0.937192     | 1.514857     | 1.156734     |
| <i>Actinobacteria</i>        | 13.58752 | 9.130458     | 5.2438       | 4.854996     | 6.900127     | 4.242318     | 12.43604     | 7.989602     | 4.716442     |
| <i>Aquificae</i>             | 0.479655 | 0.509582     | 0.778204     | 0.522001     | 0.494827     | 1.036995     | 0.597059     | 0.624468     | 0.932349     |
| <i>Bacteroidetes</i>         | 7.085634 | 6.394167     | 6.274566     | 11.5609      | 6.736202     | 8.73878      | 6.355243     | 6.676427     | 8.431541     |
| <i>Calditrichaeota</i>       | 0.966455 | 0.830781     | 1.72373      | 1.615102     | 0.980504     | 2.099335     | 1.211635     | 1.168263     | 1.926233     |
| <i>Candidatus</i>            | 0.011226 | 0.014908     | 0.026835     | 0.014213     | 0.007624     | 0.032384     | 0.005839     | 0.008964     | 0.040402     |
| <i>Chlorobi</i>              | 0.865421 | 0.818583     | 1.322789     | 1.26624      | 0.852414     | 1.316484     | 0.886829     | 0.955376     | 1.23443      |
| <i>Crenarchaeota</i>         | 0.200027 | 1.410837     | 1.659011     | 0.423157     | 0.24627      | 1.787462     | 0.597788     | 0.277873     | 1.954203     |
| <i>Cyanobacteria</i>         | 4.89963  | 4.041417     | 6.823886     | 4.717389     | 4.822465     | 5.406737     | 5.05748      | 4.909841     | 5.25161      |
| <i>Deferribacteres</i>       | 0.725606 | 0.618003     | 1.07812      | 0.783001     | 0.844027     | 1.339012     | 0.764206     | 0.817186     | 1.302802     |
| <i>Deinococcus-Thermus</i>   | 0.71438  | 0.544819     | 0.798725     | 0.534276     | 0.761683     | 0.834947     | 0.892668     | 0.599818     | 0.848437     |
| <i>Euryarchaeota</i>         | 4.716952 | 8.909549     | 16.67535     | 6.711717     | 4.622704     | 16.67852     | 9.250027     | 5.0555       | 17.27145     |
| <i>Firmicutes</i>            | 8.657271 | 7.218171     | 12.82379     | 6.712363     | 7.735005     | 13.8604      | 8.606255     | 7.132826     | 13.27292     |
| <i>Fusobacteria</i>          | 0.137773 | 0.191093     | 0.252561     | 0.144713     | 0.189849     | 0.290753     | 0.14306      | 0.181514     | 0.271003     |
| <i>Nanoarchaeota</i>         | 0        | 0.001355     | 0.006314     | 0.001938     | 0.000762     | 0.006336     | 0.00073      | 0.001494     | 0.006216     |
| <i>Planctomycetes</i>        | 0.097972 | 0.117909     | 0.232041     | 0.105305     | 0.131141     | 0.324545     | 0.105106     | 0.22185      | 0.26603      |
| <i>Proteobacteria</i>        | 52.81517 | 51.8635      | 36.31829     | 54.16276     | 59.43716     | 32.06941     | 46.71289     | 56.16998     | 32.9722      |
| <i>Spirochaetes</i>          | 0.392909 | 0.429621     | 0.722956     | 0.573684     | 0.41477      | 0.703298     | 0.456188     | 0.408593     | 0.668805     |
| <i>Synergistetes</i>         | 0.174513 | 0.224975     | 0.288867     | 0.169263     | 0.154014     | 0.396353     | 0.231378     | 0.220356     | 0.397181     |
| <i>Tenericutes</i>           | 0.035719 | 0.042013     | 0.096289     | 0.03424      | 0.04041      | 0.044352     | 0.033575     | 0.04183      | 0.045996     |
| <i>Thaumarchaeota</i>        | 0.191862 | 2.234841     | 1.002352     | 1.588614     | 0.991179     | 1.652997     | 1.694099     | 2.454547     | 1.593073     |
| <i>Thermodesulfobacteria</i> | 0.43271  | 0.363213     | 0.778204     | 0.443184     | 0.429257     | 0.960963     | 0.498522     | 0.519145     | 0.918053     |
| <i>Thermotogae</i>           | 1.684917 | 2.232131     | 3.591104     | 1.881917     | 1.577499     | 4.278222     | 2.20138      | 1.58582      | 4.030233     |
| <i>Verrucomicrobia</i>       | 0.349026 | 1.040848     | 0.554056     | 0.417342     | 0.51465      | 0.616706     | 0.324806     | 0.463869     | 0.491659     |
